# Supplementary material
Source: PubMed Central journal article supplement (PMC4703001)
Supplement: pnas.1512867112.sapp.pdf [file pnas.1512867112.sapp.pdf]

## SI Appendix

**Fig. S1. Itraconazole photoaffinity probe is active in HUVEC.**

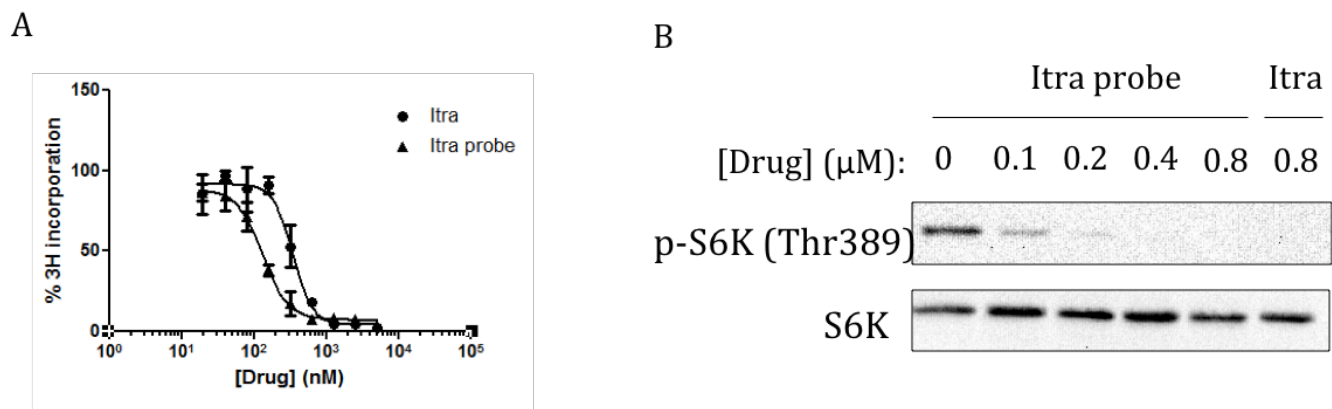

**(a)** The itraconazole probe was tested side-by-side with itraconazole for inhibition of HUVEC proliferation in the thymidine incorporation assay. The two compounds were found to have similar dose-response curves for proliferation inhibition. **(b)** HUVEC were treated with itraconazole or probe at the indicated concentrations for 24 hours. Both compounds were found to inhibit mTOR activity as measured by S6K phosphorylation.

**Fig. S2. Itraconazole probe labels small amounts of 14-alpha demethylase.**

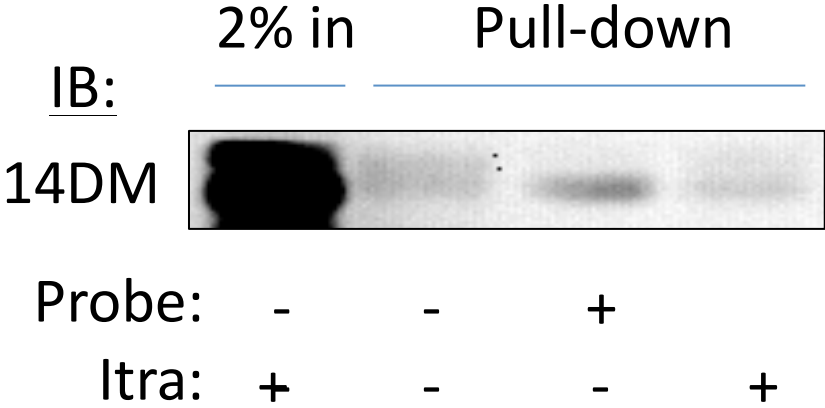

The itraconazole probe labels 14-alpha demethylase (14DM) in HUVEC, as detected after biotin pull-down and western blot with a 14DM antibody. However the signal in the probe sample is very weak compared with the input fraction, indicating that the amount of 14DM bound by the itraconazole probe is minimal.

**Fig. S3. Binding of the itraconazole probe is specific to VDAC1 over Tom40.**

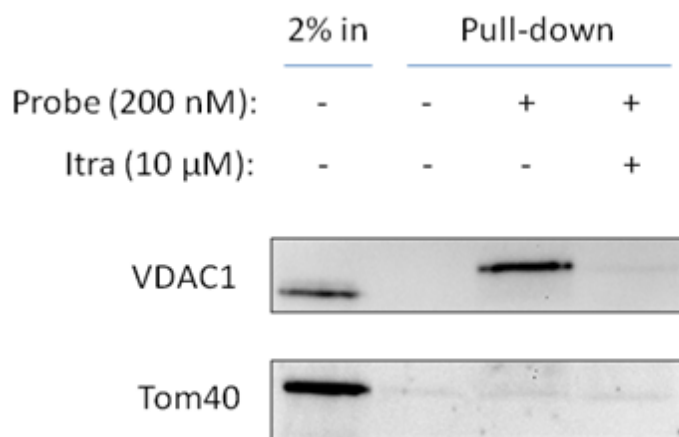

Biotin pull-down and western blot with antibodies against VDAC1 and another  $\beta$ -barrel protein of the outer mitochondrial membrane, Tom40, shows that the binding of the itraconazole probe is specific to VDAC1.

**Fig. S4. Itraconazole probe predominantly labels VDAC1 over VDAC2 and 3.**

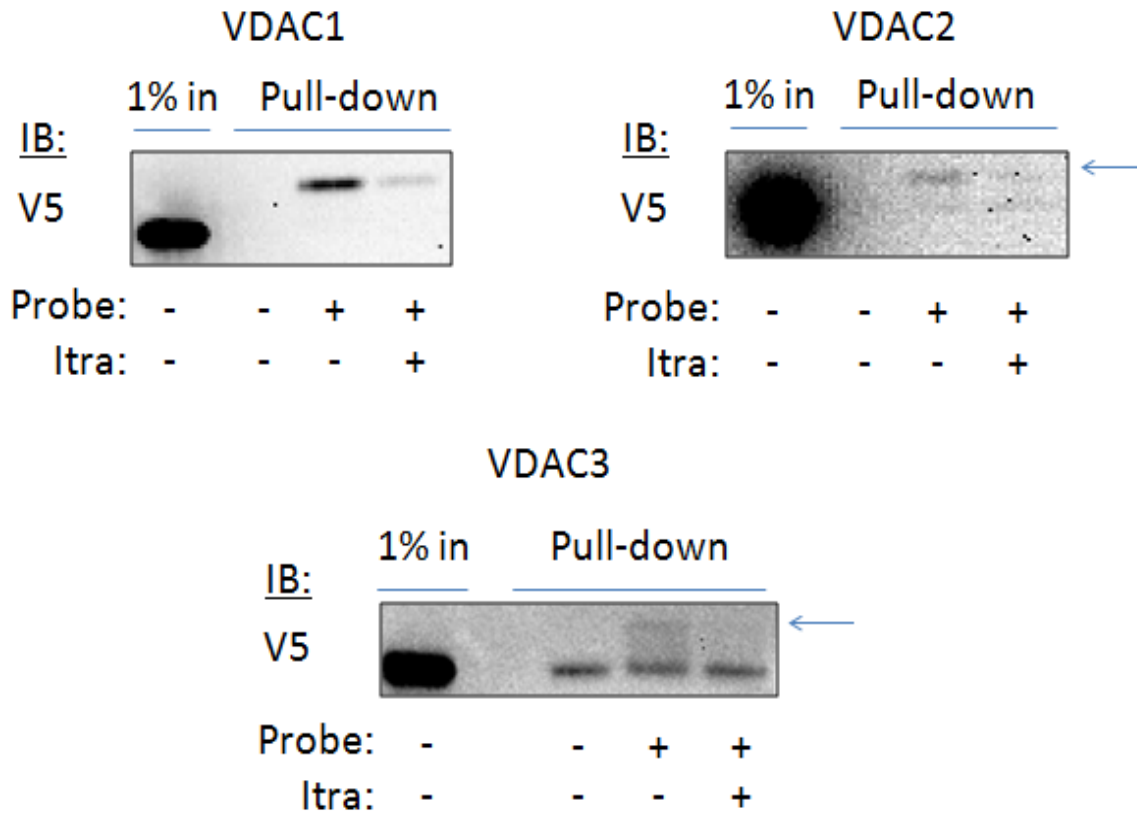

Each individual VDAC isoform with C-terminal V5 tag was expressed in 293T cells before labeling with the itraconazole probe and biotin pull-down. Detection of the expressed protein by western blotting with a V5 antibody revealed clear labeling of VDAC1 and only very faint labeling of VDACs 2 and 3 (indicated by arrows).

**Fig. S5. Itraconazole and 2DG do not increase TSC2 phosphorylation in HUVEC.**

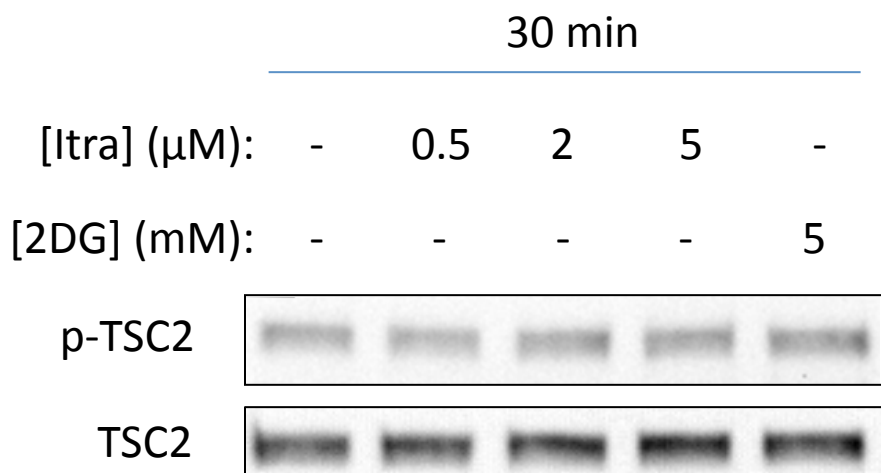

Phosphorylation of TSC2 at Ser1387 is not affected by 30 minute treatment of HUVEC with either itraconazole or 2DG at the indicated concentrations.

**Fig. S6. AMPK activation causes proliferation inhibition in HUVEC.**

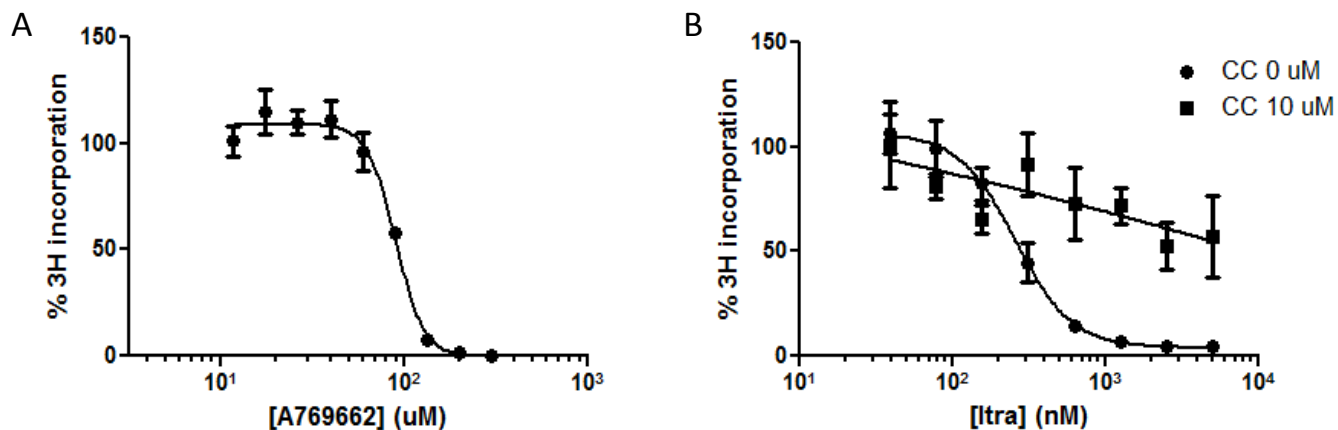

(a) HUVEC were treated with varying concentrations of A769662 for 24 hours before being pulsed for 6 hours with <sup>3</sup>H-thymidine. The average IC<sub>50</sub> from 3 independent experiments was 73 μM +/- 8.34 (SEM).

(b) HUVEC were pretreated with 10 μM Compound C for 30 minutes before being treated with varying concentrations of itraconazole for 24 hours. Cells were then pulsed for 6 hours with <sup>3</sup>H-thymidine. Results shown are averaged from 3 independent experiments, and error bars represent SEM.

**Fig. S7. FRET-based reporter of AMPK activity and T/A mutant**

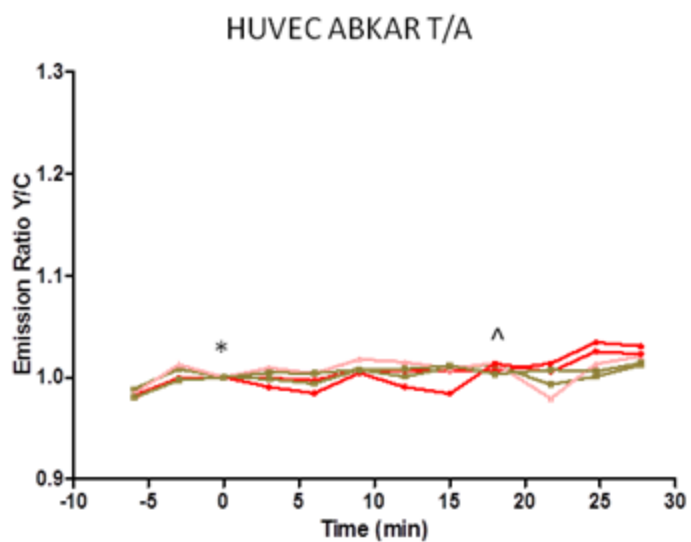

HUVEC expressing the ABKAR reporter with a T/A mutation in the AMPK substrate motif, which cannot be phosphorylated by AMPK, show no response to itraconazole (\*) or 2DG (^) treatment.

**Fig. S8. LKB1-deficient cells are insensitive to itraconazole.**

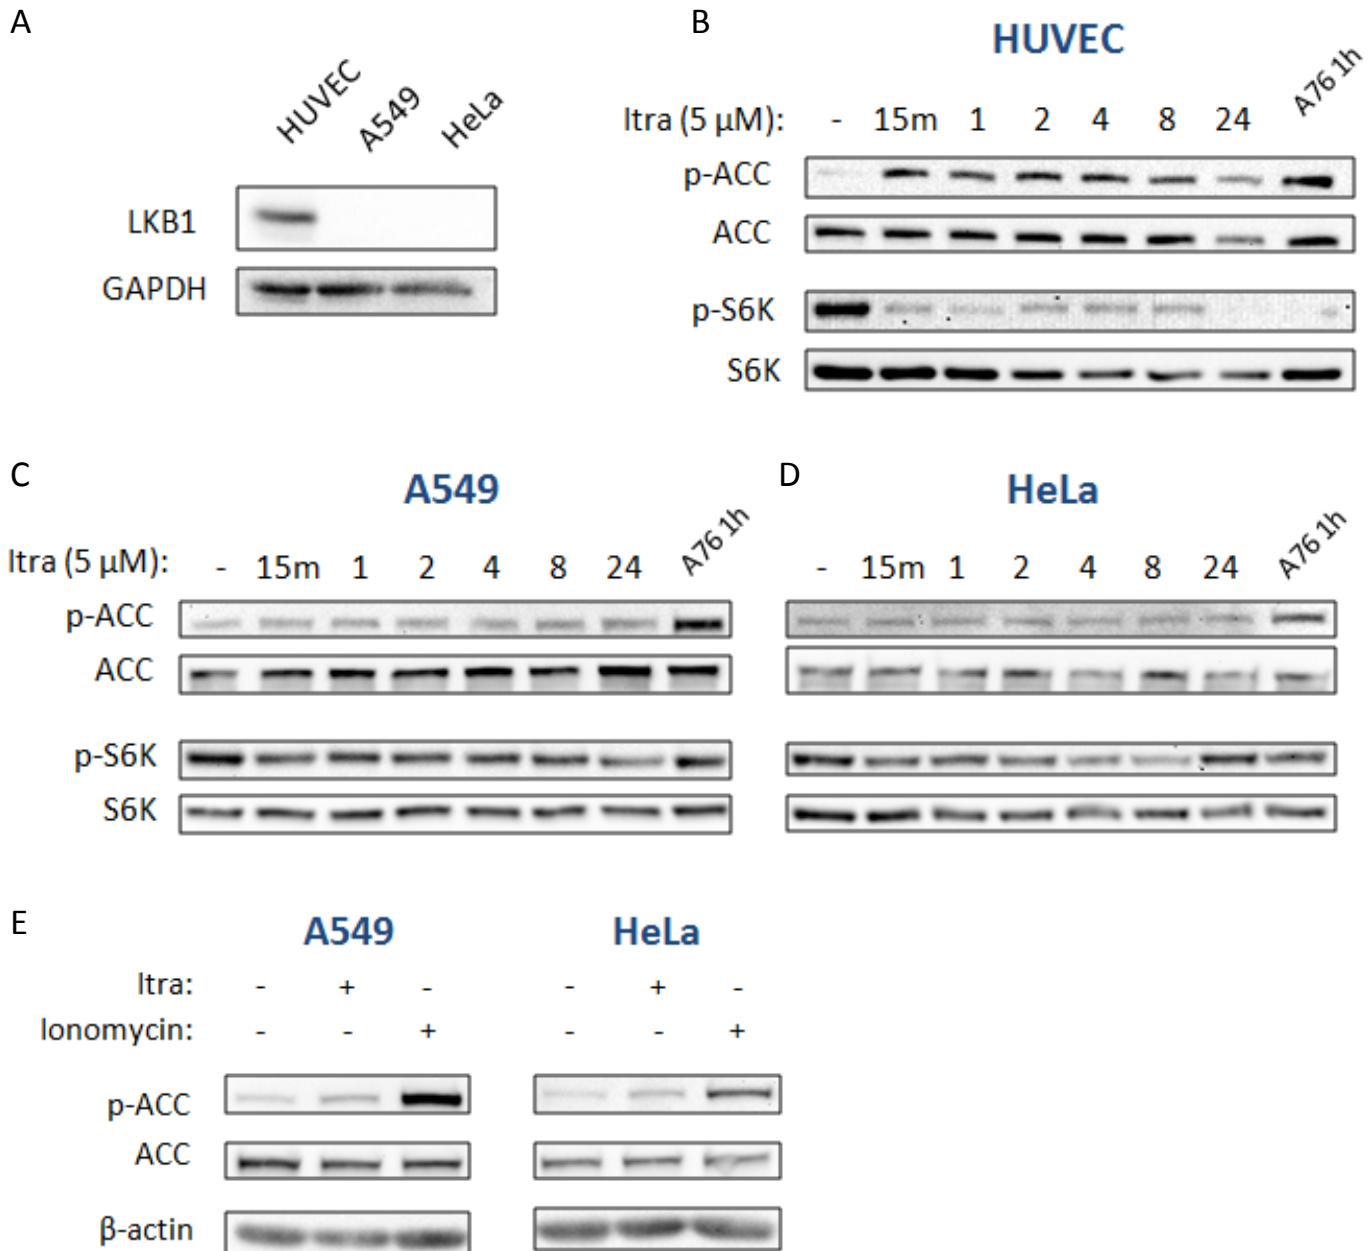

**(a)** A549 and HeLa, two commonly used cell lines which are reported to be LKB1-deficient, do not express LKB1 as measured by western blot. **(b, c, d)** HUVEC, A549, and HeLa cells were treated with 5  $\mu$ M itraconazole for the indicated times (in hours except where indicated) or 100  $\mu$ M A769662 for 1 hour. **(e)** A549 and HeLa cells were treated with either 5  $\mu$ M itraconazole or 3  $\mu$ M ionomycin for 15 minutes. Ionomycin activates AMPK in these cell lines while itraconazole does not.



**Fig. S9. Itraconazole and erastin increase the rate of calcium-induced mitochondrial swelling.**

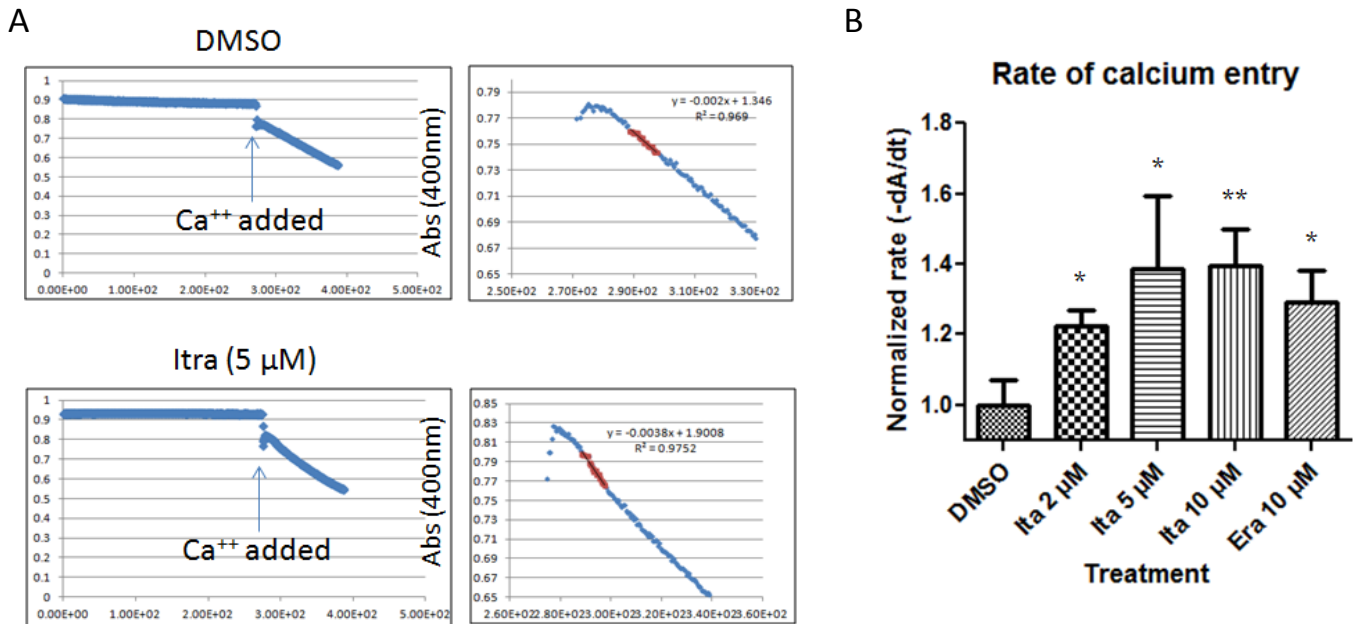

**(a)** Purified rat liver mitochondria were preincubated with itraconazole or erastin at the concentrations shown for 10 minutes before the addition of calcium, and mitochondrial swelling was monitored at 400 nm. The initial rate of swelling was calculated by linear fitting. A representative plot of absorbance vs. time is shown for DMSO treated and 5  $\mu$ M itraconazole-treated mitochondria. **(b)** Itraconazole and erastin significantly increase the rate of calcium-induced mitochondrial swelling as compared to DMSO treatment. Results shown are representative of three experiments. Error bars represent SEM of 4-5 experimental replicates. Statistically significant increase in swelling rate was calculated by an unpaired, one-tailed t-test. \*  $p < 0.05$ , \*\*  $p < 0.01$ .

**Fig. S10. Inactive azoles do not bind VDAC1, but non-azole analog does**

**A**

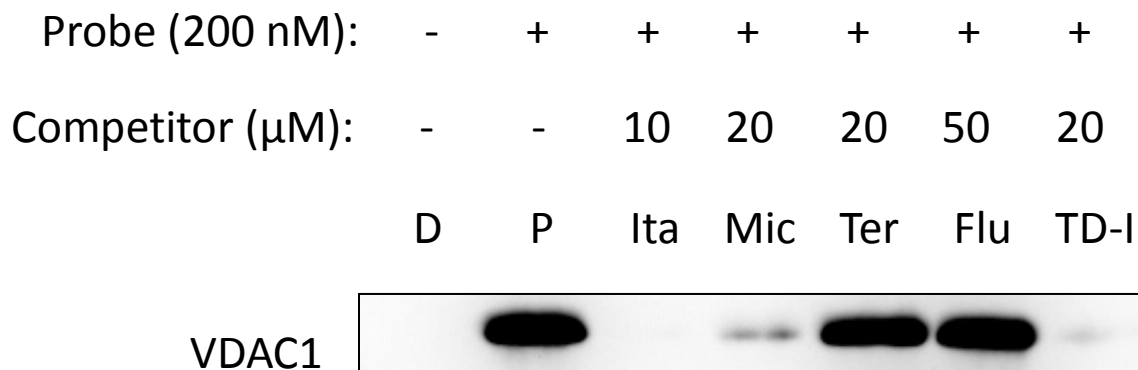

**B**

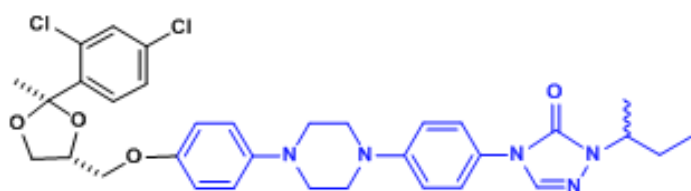

**C**

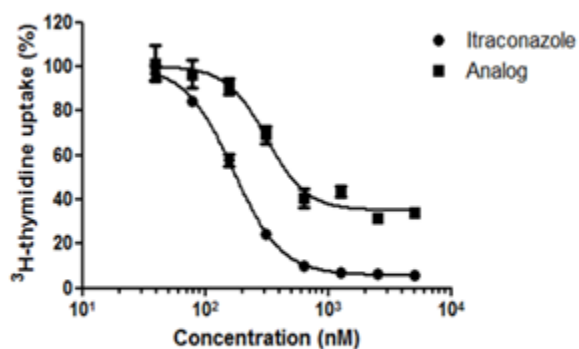

**D**

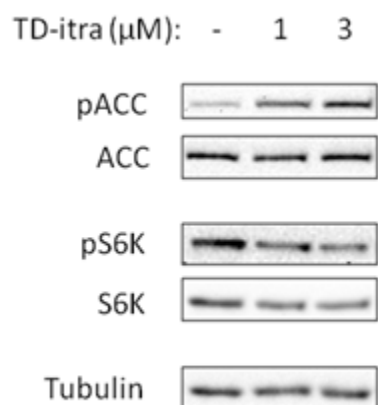

E

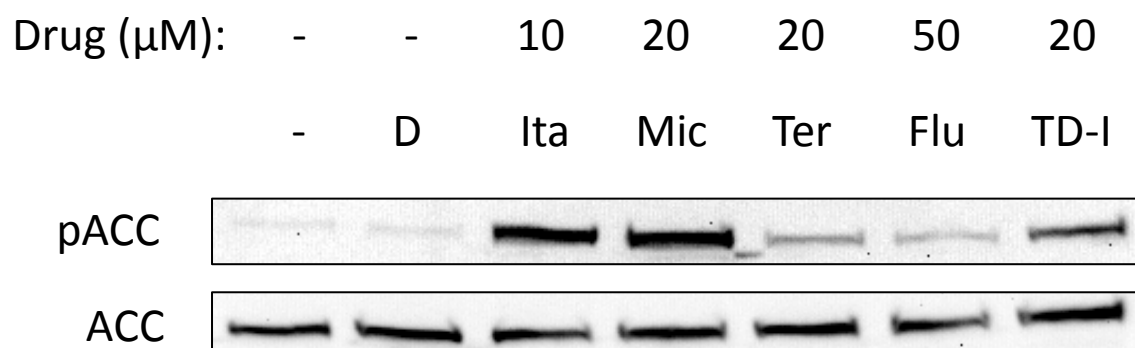

**(a)** The ability of itraconazole-like molecules to bind to VDAC1 was assessed by their ability to compete binding of the itraconazole probe to VDAC1. Cells were treated with DMSO alone (D), probe alone (P), or probe plus itraconazole (Ita), miconazole (Mic), terconazole (Ter), Fluconazole (Flu), or analog TD-itra (shown in panel b) at the indicated concentrations. **(b)** Chemical structure of TD-itra. **(c)** Dose-response curves of itraconazole and TD-itra against HUVEC proliferation. **(d)** TD-itra is able to activate AMPK and inhibit mTOR in HUVEC after a 15 minute treatment. **(e)** Compounds which bind to VDAC1 also activate AMPK.

**Table S1. MS hits from DMSO control sample (background)**

| rank | prot_acc    | prot_desc (Tax_Id=9606 Gene_Symbol)                                    | prot_score | prot_mass |
|------|-------------|------------------------------------------------------------------------|------------|-----------|
| 1    | IPI00291006 | MDH2 Malate dehydrogenase, mitochondrial                               | 752        | 35481     |
| 2    | IPI00219217 | LDHB L-lactate dehydrogenase B chain                                   | 700        | 36615     |
| 3    | IPI00022434 | ALB Putative uncharacterized protein ALB                               | 227        | 71658     |
| 4    | IPI00027462 | S100A9 Protein S100-A9                                                 | 226        | 13234     |
| 5    | IPI00013933 | DSP Isoform DPI of Desmoplakin                                         | 223        | 331569    |
| 6    | IPI00027547 | DCD Dermcidin                                                          | 218        | 11277     |
| 7    | IPI00398625 | HRNR Hornerin                                                          | 178        | 282228    |
| 8    | IPI00008530 | RPLP0 60S acidic ribosomal protein P0                                  | 167        | 34252     |
| 9    | IPI00396378 | HNRNPA2B1 Isoform B1 of Heterogeneous nuclear ribonucleoproteins A2/B1 | 159        | 37407     |
| 10   | IPI00789324 | JUP cDNA FLJ60424, highly similar to Junction plakoglobin              | 156        | 62577     |
| 11   | IPI00021700 | PCNA Proliferating cell nuclear antigen                                | 156        | 28750     |
| 12   | IPI00219221 | LGALS7;LGALS7B Galectin-7                                              | 148        | 15066     |
| 13   | IPI00397801 | FLG2 Filaggrin-2                                                       | 148        | 247928    |
| 14   | IPI00025753 | DSG1 Desmoglein-1                                                      | 138        | 113644    |
| 15   | IPI00217966 | LDHA Isoform 1 of L-lactate dehydrogenase A chain                      | 127        | 36665     |
| 16   | IPI00007047 | S100A8 Protein S100-A8                                                 | 123        | 10828     |
| 17   | IPI00025447 | EEF1A1 Elongation factor 1-alpha                                       | 122        | 47839     |
| 18   | IPI00021439 | ACTB Actin, cytoplasmic 1                                              | 117        | 41710     |
| 19   | IPI00219018 | GAPDH Glyceraldehyde-3-phosphate dehydrogenase                         | 86         | 36030     |
| 20   | IPI00790298 | - 20 kDa protein                                                       | 86         | 19534     |
| 21   | IPI00915869 | MDH1 Malate dehydrogenase                                              | 80         | 23024     |
| 22   | IPI00005969 | CAPZA1 F-actin-capping protein subunit alpha-1                         | 78         | 32902     |
| 23   | IPI00654755 | HBB Hemoglobin subunit beta                                            | 76         | 15988     |
| 24   | IPI00014587 | CLTA Isoform Brain of Clathrin light chain A                           | 76         | 27060     |
| 25   | IPI00019038 | LYZ Lysozyme C                                                         | 75         | 16526     |
| 26   | IPI00022974 | PIP Prolactin-inducible protein                                        | 69         | 16562     |
| 27   | IPI00032325 | CSTA Cystatin-A                                                        | 67         | 11000     |
| 28   | IPI00166729 | AZGP1 alpha-2-glycoprotein 1, zinc precursor                           | 65         | 34237     |
| 29   | IPI00329332 | STX12 Syntaxin-12                                                      | 63         | 31622     |
| 30   | IPI00216099 | DSC1 Isoform 1A of Desmocollin-1                                       | 60         | 99924     |
| 31   | IPI00554711 | JUP Junction plakoglobin                                               | 57         | 81693     |
| 32   | IPI00013885 | CASP14 Caspase-14                                                      | 54         | 27662     |
| 33   | IPI00219806 | S100A7 Protein S100-A7                                                 | 51         | 11464     |
| 34   | IPI00387020 | MYOZ2 Myozenin-2                                                       | 51         | 29879     |
| 35   | IPI00215911 | APEX1 DNA-(apurinic or apyrimidinic site) lyase                        | 50         | 35532     |
| 36   | IPI00418169 | ANXA2 Isoform 2 of Annexin A2                                          | 47         | 40386     |

**Table S2. MS hits from itraconazole probe sample**

| rank | prot_acc    | prot_desc (Tax_Id=9606 Gene_Symbol)                                         | prot_score | prot_mass |
|------|-------------|-----------------------------------------------------------------------------|------------|-----------|
| 1    | IPI00013933 | DSP Isoform DPI of Desmoplakin                                              | 847        | 331569    |
| 2    | IPI00216308 | VDAC1 Voltage-dependent anion-selective channel protein 1                   | 749        | 30754     |
| 3    | IPI00027462 | S100A9 Protein S100-A9                                                      | 673        | 13234     |
| 4    | IPI00745872 | ALB Isoform 1 of Serum albumin                                              | 649        | 69321     |
| 5    | IPI00219217 | LDHB L-lactate dehydrogenase B chain                                        | 560        | 36615     |
| 6    | IPI00291006 | MDH2 Malate dehydrogenase, mitochondrial                                    | 495        | 35481     |
| 7    | IPI00789324 | JUP cDNA FLJ60424, highly similar to Junction plakoglobin                   | 398        | 62577     |
| 8    | IPI00025753 | DSG1 Desmoglein-1                                                           | 341        | 113644    |
| 9    | IPI00218918 | ANXA1 Annexin A1                                                            | 300        | 38690     |
| 10   | IPI00397801 | FLG2 Filaggrin-2                                                            | 272        | 247928    |
| 11   | IPI00398625 | HRNR Hornerin                                                               | 262        | 282228    |
| 12   | IPI00554711 | JUP Junction plakoglobin                                                    | 236        | 81693     |
| 13   | IPI00021439 | ACTB Actin, cytoplasmic 1                                                   | 222        | 41710     |
| 14   | IPI00219806 | S100A7 Protein S100-A7                                                      | 209        | 11464     |
| 15   | IPI00011229 | CTSD Cathepsin D                                                            | 192        | 44524     |
| 16   | IPI00007047 | S100A8 Protein S100-A8                                                      | 190        | 10828     |
| 17   | IPI00019038 | LYZ Lysozyme C                                                              | 189        | 16526     |
| 18   | IPI00179330 | UBC;RPS27A;UBB ubiquitin and ribosomal protein S27a precursor               | 169        | 17953     |
| 19   | IPI00060800 | ZG16B Zymogen granule protein 16 homolog B                                  | 169        | 22725     |
| 20   | IPI00032325 | CSTA Cystatin-A                                                             | 167        | 11000     |
| 21   | IPI00790298 | - 20 kDa protein                                                            | 163        | 19534     |
| 22   | IPI00022204 | SERPINB3 Isoform 1 of Serpin B3                                             | 155        | 44537     |
| 23   | IPI00219221 | LGALS7;LGALS7B Galectin-7                                                   | 152        | 15066     |
| 24   | IPI00027547 | DCD Dermcidin                                                               | 145        | 11277     |
| 25   | IPI00418169 | ANXA2 Isoform 2 of Annexin A2                                               | 131        | 40386     |
| 26   | IPI00300376 | TGM3 Protein-glutamine gamma-glutamyltransferase E                          | 128        | 76584     |
| 27   | IPI00219018 | GAPDH Glyceraldehyde-3-phosphate dehydrogenase                              | 124        | 36030     |
| 28   | IPI00216298 | TXN Thioredoxin                                                             | 112        | 11730     |
| 29   | IPI00007797 | FABP5;FABP5L2;FABP5L7;FABP5L9 Fatty acid-binding protein, epidermal         | 107        | 15155     |
| 30   | IPI00947285 | SBSN suprabasin isoform 1 precursor                                         | 106        | 60505     |
| 31   | IPI00008530 | RPLP0 60S acidic ribosomal protein P0                                       | 104        | 34252     |
| 32   | IPI00216099 | DSC1 Isoform 1A of Desmocollin-1                                            | 103        | 99924     |
| 33   | IPI00154742 | IGL@;IGLV1-40;IGLC1;IGLV3-21;IGLC3;LOC100293277;IGLV2-14;LOC100293440;IGLV1 | 100        | 24777     |
| 34   | IPI00021536 | CALML5 Calmodulin-like protein 5                                            | 97         | 15883     |
| 35   | IPI00022974 | PIP Prolactin-inducible protein                                             | 96         | 16562     |
| 36   | IPI00166729 | AZGP1 alpha-2-glycoprotein 1, zinc precursor                                | 95         | 34237     |
| 37   | IPI00010303 | SERPINB4 Serpin B4                                                          | 93         | 44825     |
| 38   | IPI00217966 | LDHA Isoform 1 of L-lactate dehydrogenase A chain                           | 91         | 36665     |
| 39   | IPI00025447 | EEF1A1 Elongation factor 1-alpha                                            | 89         | 47839     |

|    |             |                                                                                   |    |        |
|----|-------------|-----------------------------------------------------------------------------------|----|--------|
| 40 | IPI00396378 | HNRNPA2B1 Isoform B1 of Heterogeneous nuclear ribonucleoproteins A2/B1            | 88 | 37407  |
| 41 | IPI00024145 | VDAC2 Isoform 2 of Voltage-dependent anion-selective channel protein 2            | 87 | 30393  |
| 42 | IPI00013885 | CASP14 Caspase-14                                                                 | 85 | 27662  |
| 43 | IPI00013877 | HNRNPH3 Isoform 1 of Heterogeneous nuclear ribonucleoprotein H3                   | 82 | 36903  |
| 44 | IPI00103242 | POF1B Isoform 1 of Protein POF1B                                                  | 80 | 68653  |
| 45 | IPI00015614 | PRSS3 Isoform A of Trypsin-3<br>LOC100290320;IGHG1;IGHV4-31;LOC100294459 Putative | 76 | 32508  |
| 46 | IPI00384938 | uncharacterized protein D                                                         | 73 | 52819  |
| 47 | IPI00031564 | GGCT Isoform 1 of Gamma-glutamylcyclotransferase                                  | 70 | 20994  |
| 48 | IPI00910602 | NEFH Isoform 1 of Neurofilament heavy polypeptide                                 | 67 | 112411 |
| 49 | IPI00005969 | CAPZA1 F-actin-capping protein subunit alpha-1                                    | 63 | 32902  |
| 50 | IPI00033583 | SERPINB12 Serpin B12                                                              | 58 | 46247  |
| 51 | IPI00019502 | MYH9 Isoform 1 of Myosin-9                                                        | 58 | 226392 |
| 52 | IPI00152881 | SHROOM3 shroom family member 3 protein                                            | 56 | 216724 |
| 53 | IPI00003348 | GNB2 Guanine nucleotide-binding protein G(I)/G(S)/G(T) subunit beta-2             | 55 | 37307  |
| 54 | IPI00291560 | ARG1 Isoform 1 of Arginase-1                                                      | 52 | 34713  |
| 55 | IPI00915869 | MDH1 Malate dehydrogenase                                                         | 32 | 23024  |

## SI METHODS

**Western Blot.** Cells (100,000 per well in 2 mL medium) were seeded in six-well plates 24 h before drug treatment. Drugs then were added to each well from 200× DMSO stock solutions (final DMSO concentration of 0.5%) and were incubated for the indicated times. Plates then were placed on ice and washed once with ice-cold PBS before the addition of 2× Laemmli sample buffer directly to the cells. Lysates were collected after 10 min and were incubated for 5 min at 95 °C before being subjected to SDS/PAGE. Proteins were then transferred to nitrocellulose membranes (Bio-Rad) and stained with Ponceau to confirm the quality of protein transfer and equal loading of samples. Membranes then were incubated in 5% (wt/vol) blotto (Santa Cruz Biotechnologies) dissolved in TBS containing 0.05% Tween-20 (TBST) for 1 h at room temperature before overnight incubation with primary antibodies at 4 °C. Membranes were washed three times for 5 min each with TBST and then were incubated with HRP-conjugated secondary antibodies (GE Healthcare) diluted in 5% blotto/TBST for 1 h at room temperature. Membranes were washed another three times for 5 min with TBST before the immune complexes were detected with Chemiluminescent ECL substrate (Millipore) on a Kodak Image Station (440CF). Band intensity was quantified using ImageJ.

**Thymidine Incorporation Assay.** HUVEC or MEFs were seeded in 96-well plates (Costar) at a density of 2,000 cells per well and were allowed to attach overnight. Drugs were serially diluted in DMSO at 200× final concentrations (0.5% DMSO) and then were diluted in medium before being added to the cells. Cells were incubated with drugs for 24 h before the addition of 1 µCi of [3H]-labeled thymidine (American Radiolabeled Chemicals) for a further 6 h. Cells then were harvested onto glass-fiber filters (PerkinElmer) using a Mach III M Harvester 96 (Tomtec, Inc.). Filters were dried overnight before being sealed in sample bags with 4 mL of Betaplate Scint scintillation fluid (PerkinElmer), and then

scintillation was counted using a 1450 Microbeta apparatus (PerkinElmer). The counts per minute of drug-treated cells were normalized to control cells treated with DMSO alone. Drug dose–response curves and IC50 values were generated using GraphPad Prism 5 software.

**Chemistry.** Reactions were carried out in oven-dried glassware. All reagents were purchased from commercial sources and were used without further purification unless noted. Unless stated otherwise, all reactions were carried out under a argon atmosphere and monitored by Merck precoated silica gel 60F-254 plates and visualized using 254 nm UV light. Column chromatography was performed on silica gel (200–400 mesh, Merck). The ratio between silica gel and crude product ranged from 100 to 50:1 (w/w). NMR data were collected on a Varian Unity-400 (400 MHz  $^1\text{H}$ , 100 MHz  $^{13}\text{C}$ ) machine in the Department of Pharmacology and Molecular Sciences at the Johns Hopkins School of Medicine.  $^1\text{H}$  NMR spectra were obtained in deuteriochloroform ( $\text{CDCl}_3$ ) with either tetramethylsilane (TMS,  $\delta = 0.00$  for  $^1\text{H}$ ) or chloroform ( $\text{CHCl}_3$ ,  $\delta = 7.27$  for  $^1\text{H}$ ) as an internal reference.  $^{13}\text{C}$  NMR spectra were proton decoupled and were in  $\text{CDCl}_3$  with either TMS ( $\delta = 0.0$  for  $^{13}\text{C}$ ) or  $\text{CHCl}_3$  ( $\delta = 77.0$  for  $^{13}\text{C}$ ) as an internal reference. Chemical shifts are reported in ppm ( $\delta$ ). Data are presented in the form: chemical shift (multiplicity, coupling constants, and integration).  $^1\text{H}$  data are reported as though they were first order. The errors between the coupling constants for two coupled protons were less than 0.5 Hz, and the average number was reported. Low-resolution mass spectra were obtained on a API 150EX™ single quadrupole LC/ESI-MS system in the Department of Pharmacology and Molecular Sciences or on a Voyager DE-STR, MALDI-TOF instrument at the AB Mass Spectrometry/Proteomics Facility at the Johns Hopkins University. The reported purity values were obtained with a JASCO PU-2089S Plus quaternary pump system, using an MD-2010 Plus PDA detector at the wavelength of 256 nm and a



Varian Microsorb-MV 100\_5 C18 column. The eluant consisted of acetonitrile and 0.125% diethylamine in water, the ratio and flow rate of which depends on the compound.

## 1. Synthesis and Characterization of itraconazole probe

The synthesis of the probe started with 2-bromoethanol and ethyl acetoacetate (**Scheme S1**). Ethyl 3-oxohept-6-ynoate (**2**) was synthesized from ethyl acetoacetate based on the previously reported procedure.<sup>1</sup> The THP (3,4-dihydro-2*H*-pyran) protection of 2-bromoethanol yielded **3**, which was coupled with **2**, followed by thermal decarboxylation under strong basic conditions, to give compound **5** in moderate yield over two steps. This reaction sequence allows flexible control of the chain length by replacing 2-bromoethanol with other bromo-substituted alcohols if needed. Next, by following the literature-reported procedure (1) the ketone group was converted to the diazirine moiety. The yield could be significantly improved if pure ammonia had been used instead of the ammonia solution in methanol (2). Compound **9** was prepared in high yield from **7** by the deprotection of THP, followed by the tosylation of the free hydroxyl group. Subsequently, the S<sub>N</sub>2 displacement of the tosylate group by the triazolone compound **10** (3) afforded the probe **1**.

### Scheme S1<sup>a</sup>

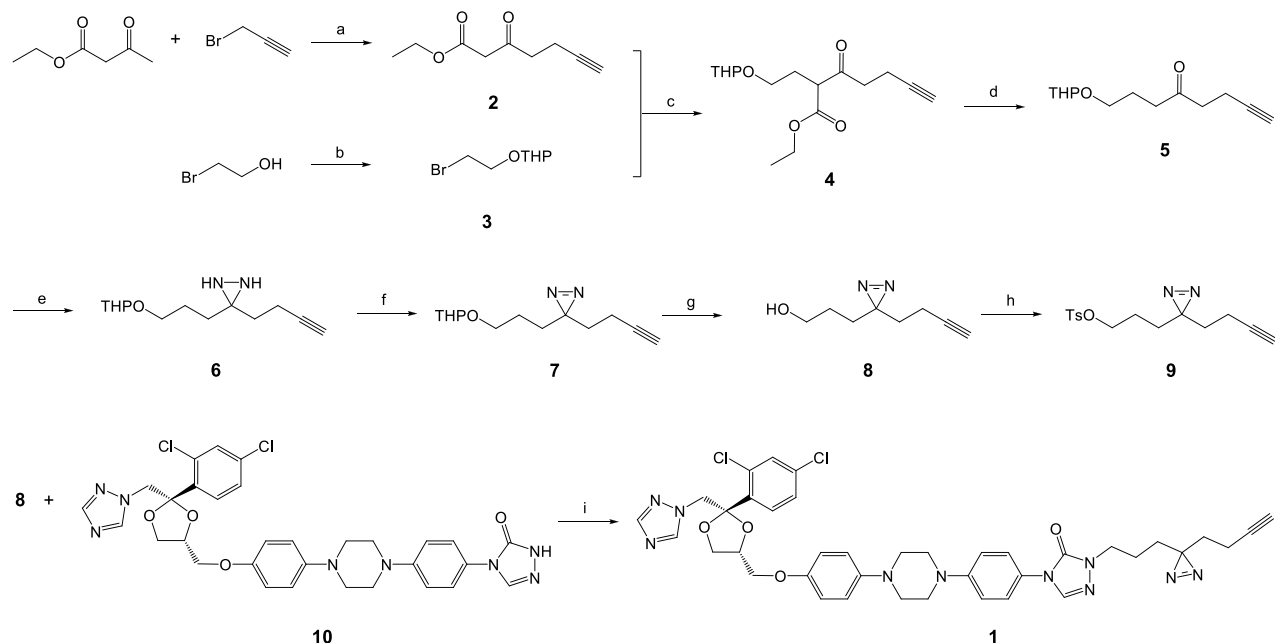

<sup>a</sup> Reagents and conditions: (a) LDA, THF, 0 °C, 74%; (b) THP, PTSA, CH<sub>2</sub>Cl<sub>2</sub>, rt, 91%; (c) K<sub>2</sub>CO<sub>3</sub>, KI, DMF/Acetone, 80 °C; (d) 10% aq. KOH, MeOH, 48% over 2 steps; (e) 7N ammonia in MeOH, NH<sub>2</sub>SO<sub>4</sub>H; (f) I<sub>2</sub>, Et<sub>3</sub>N, CH<sub>2</sub>Cl<sub>2</sub>, 17% over 2 steps; (g) CSA, MeOH, rt, 86%; (h) TsCl, Et<sub>3</sub>N, DMAP, CH<sub>2</sub>Cl<sub>2</sub>, rt, 93%; (i) K<sub>2</sub>CO<sub>3</sub>, 18-crown-6, CH<sub>3</sub>CN, 40 °C, 52%.

**1.1. 2-(2-Bromoethoxy)tetrahydro-2H-pyran (3):** 3,4-dihydro-2H-pyran (THP) (0.77 g, 9.24 mmol) and a catalytic amount of *p*-toluenesulfonic acid (PTSA) (8.8 mg, 0.046 mmol) was added to a solution of 2-bromoethanol (1.15 g, 9.24 mmol) in CH<sub>2</sub>Cl<sub>2</sub> (15 mL) and the mixture was allowed to stir at room temperature for 3 h. The reaction mixture was washed with aqueous Na<sub>2</sub>CO<sub>3</sub> solution. The resulting solution was extracted with more CH<sub>2</sub>Cl<sub>2</sub>, dried over Na<sub>2</sub>SO<sub>4</sub>, filtered, and concentrated to yield the crude product, which was purified by column chromatography (neat Hexanes → 50:1 Hexanes–Ethyl Acetate) to afford **3** (1.76 g, 91%) as a colorless thin oil: <sup>1</sup>H NMR (400 MHz, CDCl<sub>3</sub>, δ<sub>H</sub>) 4.66 (t, *J* = 4.0 Hz, 1H), 4.05–3.95 (m, 1H), 3.92–3.85 (m, 1H), 3.79–3.71 (m, 1H), 3.55–3.45 (m, 3H), 1.90–1.47 (m, 6H); <sup>13</sup>C NMR (100 MHz, CDCl<sub>3</sub>, δ<sub>C</sub>) 98.89, 67.51, 62.24, 30.90, 30.42, 25.36, 19.25.

**1.2. 1-(Tetrahydro-2H-pyran-2-yloxy)oct-7-yn-4-one (5):** 2-(2-Bromoethoxy)tetrahydro-2H-pyran (**3**) (1.76 g, 8.42 mmol), ethyl 3-oxohept-6-ynoate (**2**) (1.84 g, 10.95 mmol), and K<sub>2</sub>CO<sub>3</sub> (3.03 g, 21.9 mmol) were mixed in acetone (40 mL) and DMF (4 mL), and refluxed for 24 h. Most of the acetone was removed under reduced pressure and the residue was worked up with water and extracted with diethyl ether. The solvent was removed again and the crude residue was purified by a quick column to remove most of the dialkylated by-product. The collected ethyl 3-oxo-2-(2-(tetrahydro-2H-pyran-2-yloxy)ethyl)hept-6-ynoate (**3**) (1.57 g) was refluxed for 2 h in a mixture of 10% aqueous KOH (6 mL, 10.7 mmol) and methanol (6 mL). The mixture was diluted with water and extracted with diethyl ether. The resulting solution was dried (Na<sub>2</sub>SO<sub>4</sub>), filtered, and concentrated to yield the crude product, which was purified by column chromatography (50:1 → 10:1 Hexanes–Ethyl Acetate) to afford **5** (0.91 g, 48%) as a colorless thin oil: <sup>1</sup>H NMR (400 MHz, CDCl<sub>3</sub>, δ<sub>H</sub>) 4.55 (t, *J* = 4.0 Hz, 1H), 3.88–3.80 (m, 1H), 3.78–3.70 (m, 1H), 3.54–3.45 (m, 1H), 3.45–3.36 (m, 1H), 2.69 (t, *J* = 7.3 Hz, 2H), 2.62–2.52 (m, 2H), 2.50–2.42 (m, 2H), 1.98–1.66 (m, 5H), 1.65–1.40 (m, 4H); <sup>13</sup>C NMR (100 MHz, CDCl<sub>3</sub>, δ<sub>C</sub>) 208.28, 98.92, 83.19, 68.66, 66.50, 62.49, 41.28, 39.66, 30.68, 25.43, 23.89, 19.70, 12.93.

**1.3. 3-(But-3-ynyl)-3-(3-(tetrahydro-2H-pyran-2-yloxy)propyl)-3H-diazirine (7):** To a 100 mL thick wall pressure vessel containing 1-(Tetrahydro-2H-pyran-2-yloxy)oct-7-yn-4-one (**5**) (0.91 g, 4.06 mmol) in an ice bath was added 7N ammonia in MeOH (4 mL, 28 mmol). After the vessel was sealed, the reaction mixture was stirred at 0 °C for 4 h. Hydroxylamine O-Sulfonic acid (0.53 g, 4.67 mmol) was dissolved in methanol and then added dropwise into the reaction mixture. After stirring overnight, most ammonia was removed by gently blowing air through the suspension using a glass pipette, and then the white precipitate was filtered off. After solvents were removed under vacuum, the residue was redissolved in CH<sub>2</sub>Cl<sub>2</sub> followed by the addition of triethylamine (0.62 g, 6.09 mmol). Subsequently, the solution was cooled to 0 °C, and iodine was slowly added until the color of iodine persists for 1 min.

After 2 h, CH<sub>2</sub>Cl<sub>2</sub> was evaporated and the reaction mixture was extracted with ether and dried (Na<sub>2</sub>SO<sub>4</sub>), filtered, and concentrated to yield the crude product, which was purified by column chromatography (50:1 → 4:1 Hexanes–Ethyl Acetate) to afford **7** (163.1 mg, 17%) as a colorless thin oil: <sup>1</sup>H NMR (400 MHz, CDCl<sub>3</sub>, δ<sub>H</sub>) 4.54 (t, *J* = 3.5 Hz, 1H), 3.87–3.77 (m, 1H), 3.72–3.62 (m, 1H), 3.55–3.44 (m, 1H), 3.38–3.28 (m, 1H), 2.10–1.95 (m, 3H), 1.85–1.35 (m, 12H); <sup>13</sup>C NMR (100 MHz, CDCl<sub>3</sub>, δ<sub>C</sub>) 98.83, 82.80, 69.08, 66.42, 62.33, 32.27, 30.65, 29.50, 28.05, 25.43, 24.11, 19.58, 13.33.

**1.4. 3-(3-(But-3-ynyl)-3*H*-diazirin-3-yl)propan-1-ol (8):** To a solution of compound **7** (163.1 mg, 0.69 mmol) in methanol (3 mL) was added (+)-camphorsulfonic acid (CSA) (16 mg, 0.069 mmol). The resulting mixture was stirred at room temperature and monitored by TLC. Once the reaction was over, the solution was neutralized with saturated aqueous Na<sub>2</sub>CO<sub>3</sub> and extracted with ether. The combined organic layer was dried (Na<sub>2</sub>SO<sub>4</sub>), filtered, and concentrated to yield the crude product, which was purified by column chromatography (50:1 → 2:1 Hexanes–Ethyl Acetate) to afford **8** (90.3 mg, 86%) as a colorless thin oil: <sup>1</sup>H NMR (400 MHz, CDCl<sub>3</sub>, δ<sub>H</sub>) 3.60 (t, *J* = 6.4 Hz, 2H), 2.05–1.97 (m, 3H), 1.69–1.60 (m, 3H), 1.57–1.50 (m, 2H), 1.42–1.33 (m, 2H); <sup>13</sup>C NMR (100 MHz, CDCl<sub>3</sub>, δ<sub>C</sub>) 82.80, 69.16, 61.85, 32.27, 28.96, 28.03, 26.76, 13.32.

**1.5. 3-(3-(But-3-ynyl)-3*H*-diazirin-3-yl)propan-1-ol (9):** To a solution of **8** (90.3 mg, 0.59 mmol), Et<sub>3</sub>N (90.0 mg, 0.89 mmol), and *N,N*-dimethylamino-pyridine (DMAP) (70.0 mg, 0.59 mmol) in CH<sub>2</sub>Cl<sub>2</sub> was slowly added a solution of *p*-toluenesulfonic chloride (TsCl) (146.2 mg, 0.77 mmol) in CH<sub>2</sub>Cl<sub>2</sub> at 0 °C. The reaction mixture was stirred at 0 °C for 1 h, and then warmed to room temperature for another 3 h. After diluted with water, the reaction mixture was extracted with more CH<sub>2</sub>Cl<sub>2</sub>. The organic layer was combined, dried (Na<sub>2</sub>SO<sub>4</sub>), filtered, and concentrated to yield the crude product, which was purified by column chromatography (50:1 → 10:1 Hexanes–Ethyl Acetate) to afford **9** (90.3 mg, 86%) as a

colorless thin oil:  $^1\text{H}$  NMR (400 MHz,  $\text{CDCl}_3$ ,  $\delta_{\text{H}}$ ) 7.78 (d,  $J = 8.1$  Hz, 2H), 7.78 (d,  $J = 8.1$  Hz, 2H), 3.98 (t,  $J = 5.9$  Hz, 2H), 2.46 (s, 3H), 2.00–1.91 (m, 3H), 1.60–1.52 (m, 2H), 1.52–1.39 (m, 4H);  $^{13}\text{C}$  NMR (100 MHz,  $\text{CDCl}_3$ ,  $\delta_{\text{C}}$ ) 144.96, 132.88, 129.93, 127.89, 82.55, 69.32 (2C), 32.12, 28.73, 27.48, 23.30, 21.68, 13.23.

**1.6. *Cis*-4-(4-(4-(4-(((2*S*,4*R*)-2-((1*H*-1,2,4-triazol-1-yl)methyl)-2-(2,4-dichlorophenyl)-1,3-dioxolan-4-yl)methoxy)phenyl)piperazin-1-yl)phenyl)-1-(3-(3-(but-3-ynyl)-3*H*-diazirin-3-yl)propyl)-1*H*-1,2,4-triazol-5(4*H*)-one (1):** To a slurry of **10** (25.3 mg, 0.039 mmol) in acetonitrile was added **9** (17.9 mg, 0.058 mmol),  $\text{K}_2\text{CO}_3$  (10.8 mg, 0.078 mmol) and 18-Crown-6 (10.3 mg, 0.039 mmol). After the mixture was stirred at 40–50 °C under argon for 16 h, the solvent was removed under vacuum to yield the crude product, which was purified by column chromatography (neat  $\text{CH}_2\text{Cl}_2 \rightarrow 40:1 \text{CH}_2\text{Cl}_2\text{--CH}_3\text{OH}$ ) to afford **1** (15.8 mg, 52%) as a white wax-like solid:  $^1\text{H}$  NMR (400 MHz,  $\text{CDCl}_3$ ,  $\delta_{\text{H}}$ ) 8.23 (s, 1H), 7.92 (s, 1H), 7.64–7.56 (m, 2H), 7.52–7.38 (m, 3H), 7.30–7.24 (m, 1H), 7.08–6.91 (m, 4H), 6.82 (d,  $J = 8.5$  Hz, 2H), 4.83 (q,  $J = 14.4$  Hz, 2H), 4.42–4.31 (m, 1H), 3.98–3.75 (m, 5H), 3.53–3.45 (m, 1H), 3.42–3.32 (m, 4H), 3.30–3.19 (m, 4H), 2.07–1.95 (m, 3H), 1.70–1.52 (m, 6H);  $^{13}\text{C}$  NMR (100 MHz,  $\text{CDCl}_3$ ,  $\delta_{\text{C}}$ ) 152.63, 152.11, 151.49, 150.67, 145.98, 136.08, 134.23, 134.06, 133.14, 131.46, 129.63, 127.28, 125.65, 123.63, 118.51, 116.68, 115.27, 107.63, 82.72, 74.71, 74.55, 69.23, 67.63, 67.46, 53.62, 50.61, 49.17, 44.81, 32.19, 29.90, 27.81, 23.15, 13.33. ESI-MS: 783.2 ( $\text{M}+\text{H}^+$ ), 755.2 ( $\text{M}+\text{H}^+-\text{N}_2$ ). Purity: 93%,  $t_{\text{R}} = 10.2$  min.

## 2. Synthesis and Characterization of Triazole Deleted-Itra (TD-Itra).

Scheme S2<sup>a</sup>:

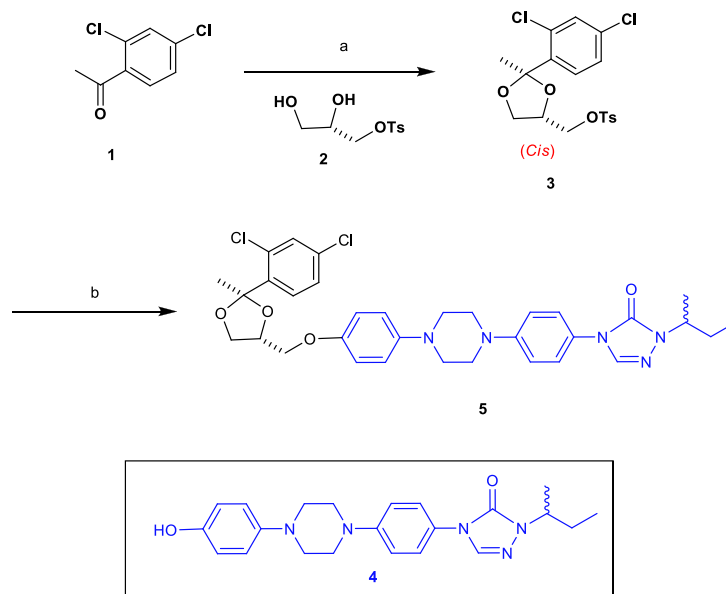

<sup>a</sup> Reagents and conditions: (a) **2**, TfOH, toluene, rt, 60 h, 60%; (b) **4**, NaH, DMSO, 80 °C, 12 h, 73%.

### **((2R,4S)-2-(2,4-dichlorophenyl)-2-methyl-1,3-dioxolan-4-yl)methyl 4-methylbenzenesulfonate (3):**

TfOH (4 eq) was added to the solution of 2',4'-Dichloroacetophenone (**1**) (1 eq) and (*S*)-1-tosyloxy 2,3-propanediol (**2**) (2 eq) in toluene under argon atmosphere. Then the reaction was stirred at room temperature for 60h. The reaction was quenched by adding saturated aqueous NaHCO<sub>3</sub>, then extracted with ethylacetate, washed with brine and dried over Na<sub>2</sub>SO<sub>4</sub>. The solvent was removed under the reduced pressure and the crude product was purified by column chromatography to afford the *cis* dioxalane product **3** as colorless oil in 60% yield.

**<sup>1</sup>H NMR (500 MHz, CDCl<sub>3</sub>, δ<sub>H</sub>):** 7.73 (dd, J = 10.5, 2.0 Hz, 2H), 7.41 (d, J = 8.5 Hz, 1H), 7.28 (d, J = 2.5 Hz, 3H), 7.12 (d, J = 3.0 Hz, 1H), 4.11-4.07 (m, 1H), 4.02 (dd, J = 10.2, 5.2 Hz, 1H), 3.96 (dd, J = 10.0, 6.0 Hz, 1H), 3.78 (dd, J = 9.0, 4.0 Hz, 1H), 3.63 (dd, J = 9.0, 7.0 Hz, 1H), 2.37 (s, 3H), 1.61 (s, 3H).

**<sup>13</sup>C NMR (125 MHz, CDCl<sub>3</sub>, δ<sub>C</sub>):** 145.2, 137.6, 132.6, 131.2, 130.0, 128.0, 126.8, 109.4, 77.4, 77.1, 76.9, 72.8, 69.4, 66.2, 25.6, 21.7.

**1-sec-butyl-4-(4-(4-4-(((2R,4R)-2-(2,4-dichlorophenyl)-2-methyl-1,3-dioxolan-4-yl)methoxy)phenyl)piperazin-1-yl)phenyl)-1H-1,2,4-triazol-5(4H)-one (4).**

To a solution of tosylate **3** (1 eq) in dry DMF was added sodium hydride (NaH, 60% dispersion in mineral oil, (1.5 eq)) under argon atmosphere. After the reaction mixture was stirred at 50 °C for 1 hour. A solution of **4** (1.2 eq) in DMF was added slowly at the same temperature. After the addition the temperature was increased to 90 °C and stirred for another 3 hours. The reaction mixture was quenched by the saturated sodium chloride, and the resulting mixture was extracted twice with dichloromethane. The organic fractions were dried over Na<sub>2</sub>SO<sub>4</sub>, filtered and concentrated under vacuum to yield the crude product which was purified by column chromatography to afford the desired product **5** in 73% yield.

**<sup>1</sup>H NMR (500 MHz, CDCl<sub>3</sub>, δ<sub>H</sub>):** 7.62 (s, 1H), 7.61 (d, J = 8.5 Hz, 1H), 7.43 (d, J = 9.0 Hz, 2H), 7.41 (d, J = 3.0 Hz, 1H), 7.23 (dd, J = 8.5, 2.0 Hz, 1H), 7.03 (d, J = 9.0 Hz, 2H), 6.95 (d, J = 8.0 Hz, 2H), 6.89 (d, J = 9.0 Hz, 2H), 4.34-4.27 (m, 2H), 4.12 (dd, J = 9.5, 5.5 Hz, 1H), 4.01 (dd, J = 8.5, 4.5 Hz, 1H), 3.96 (dd, J = 9.2, 6.2 Hz, 1H), 3.84 (dd, J = 7.5, 6.7 Hz, 1H), 3.37 (bs, 4H), 3.24 (bs, 4H), 1.90 – 1.84 (m, 1H), 1.82 (s, 3H), 1.75 – 1.69 (m, 1H), 1.39 (d, J = 6.5 Hz, 3H), 0.91 (t, J = 7.2 Hz, 3H).

**$^{13}\text{C}$  NMR (125 MHz,  $\text{CDCl}_3$ ,  $\delta_{\text{C}}$ ):** 138.2, 134.6, 133.9, 132.8, 131.2, 128.9, 126.8, 123.6, 118.5, 116.7, 115.5, 109.1, 73.9, 69.3, 67.0, 52.7, 50.7, 49.3, 28.5, 25.7, 19.3, 10.8.



## SI REFERENCES

1. Bond, M. R.; Zhang, H.; Vu, P. D.; Kohler, J. J., Photocrosslinking of glycoconjugates using metabolically incorporated diazirine-containing sugars. *Nat. Protocols* **2009**, *4* (7), 1044-1063.
2. Li, Z.; Hao, P.; Li, L.; Tan, C. Y. J.; Cheng, X.; Chen, G. Y. J.; Sze, S. K.; Shen, H.-M.; Yao, S. Q., Design and Synthesis of Minimalist Terminal Alkyne-Containing Diazirine Photo-Crosslinkers and Their Incorporation into Kinase Inhibitors for Cell- and Tissue-Based Proteome Profiling. *Angew. Chem. Int. Ed.* **2013**, *52* (33), 8551-8556.
3. Heeres, J.; Backx, L. J. J.; Van Cutsem, J., Antimycotic azoles. 7. Synthesis and antifungal properties of a series of novel triazol-3-ones. *J. Med. Chem.* **1984**, *27* (7), 894-900.
